# Supplementary material
Source: Elsevier journal article supplement (https://git.physik.uzh.ch/gitbucket/mchrzasz/Lecture_repo/raw/e4b4b03fdbc260ba9d49db62d219dacc09001e83/Lectures_others/MC/W_Placzek_2010/mmc06.pdf)

# Generatory liczb losowych o dowolnych rozkładach prawdopodobieństwa

## – Metody ogólne –

- Metoda odwracania dystrybuanty.
- Metoda eliminacji.
- Metoda superpozycji rozkładów.
- Kombinacja metody superpozycji i metody eliminacji.
- Metoda AC.
- Algorytmy wielokanałowe (rozgałęzione)

⇒ <http://th-www.if.uj.edu.pl/~placzek/dydaktyka/MMC/>

Niech  $U$  – liczb losowa z rozkładu równomiernego na  $(0, 1)$ , tzn.  $U \in \mathcal{U}(0, 1)$ ,  
a  $F$  – funkcja ciągła i **ściśle rosnąca** oraz  $F(-\infty) = 0$  i  $F(+\infty) = 1$ .

Wówczas zmienna losowa:

$$X = F^{-1}(U)$$

ma **rozkład prawdopodobieństwa o dystrybuancie  $F$** .

Dowód:  $\mathcal{P}[X \leq x] = \mathcal{P}[F^{-1}(U) \leq x] = \mathcal{P}[U \leq F(x)] = F(x). \quad \boxtimes$

► **Wniosek:**

Jeżeli  $\{U_i\}, i = 1, \dots, n$ , – ciąg liczb losowych o rozkładzie  $\mathcal{U}(0, 1)$ , to  
 $\{X_i = F^{-1}(U_i)\}, i = 1, \dots, n$ , – **ciąg liczb losowych o rozkładzie z dystrybuantą  $F$** .

PRZYKŁAD: Rozkład wykładniczy  $E(0, 1)$ :

gęstość prawdopodobieństwa:  $\rho(X) = e^{-X}, X \geq 0$ ,

$\Rightarrow$  **Dystrybuanta:**  $F(x) = \int_0^x e^{-X} dX = 1 - e^{-x}$ .

Niech  $R \in \mathcal{U}(0, 1)$ :  $R = F(X) = 1 - e^{-X} \Rightarrow X = -\ln(1 - R)$ ,

Jeżeli  $R \in \mathcal{U}(0, 1)$ , to  $(1 - R) \in \mathcal{U}(0, 1) \Rightarrow$  ostatecznie:  $X = -\ln R$ .

⇒ **Ćw. N8.1:** W oparciu o metodę odwracania dystrybuanty skonstruować generatory liczb losowych dla poniższych rozkładów, następnie wykonać histogramy i porównać z dokładnymi rozkładami.

(a) Rozkład wykładniczy  $E(\theta, \lambda)$  o gęstości prawdopodobieństwa:

$$\rho_{\theta, \lambda}(X) = \frac{1}{\lambda} \exp\left(-\frac{X - \theta}{\lambda}\right), \quad X \geq \theta;$$

→ Wsk. Skorzystać z generatora rozkładu  $E(0, 1)$ .

(b) Rozkład o gęstości prawdopodobieństwa:

$$\rho(X) = \frac{c}{X}$$

na przedziale  $[a, b]$ , gdzie:  $0 < a < b < +\infty$ ;

→ Wsk. Najpierw wyznaczyć  $c = c(a, b)$  z warunku normalizacji.

(c) Rozkład Cauchy'ego (Breita–Wignera)  $C(\theta, \lambda)$  o gęstości prawdopodobieństwa:

$$\rho_{\theta, \lambda}(X) = \frac{\lambda}{\pi} \frac{1}{(X - \theta)^2 + \lambda^2}, \quad -\infty < X < +\infty$$

→ Wsk. Najpierw skonstruować generator rozkładu  $C(0, 1)$ , a następnie dokonać odpowiedniej transformacji zmiennej.

Jeżeli  $F$  – dowolna funkcja **niemalejąca**, prawostronnie ciągła oraz  $F(-\infty) = 0$  i  $F(+\infty) = 1$  (czyli  $F$  jest dystrybuantą pewnej zmiennej losowej), to **zmienna losowa**:

$$X = \inf \{x : U \leq F(x)\}, \quad \text{gdzie } U \in \mathcal{U}(0, 1),$$

ma **rozkład o dystrybuancie  $F$** .

Dowód:

Udowodnimy, że zdarzenie losowe  $\{X \leq t\}$  zachodzi  $\Leftrightarrow$  zachodzi zdarzenie losowe  $\{U \leq F(t)\}$ .

1° Niech  $X = t$ : z def. zmiennej losowej  $X$  jako infimum  $\Rightarrow \forall_{m \in \mathbb{N}} \exists x_m : t \leq x_m < t + 1/m$  oraz  $U \leq F(x_m)$ . Dla  $m \rightarrow \infty$  mamy:  $t \leq x_m \rightarrow t$  (z prawej strony)  $\Rightarrow U \leq F(t)$  (bo dystrybuanta prawostronnie ciągła).

2° Niech  $X < t$ :  $\exists y \in \{x : U \leq F(x)\} : y < t \Rightarrow F(y) \leq F(t)$  oraz  $U \leq F(y) \Rightarrow U \leq F(t)$ .

3° Niech  $U \leq F(t)$ , zatem  $t \in \{x : U \leq F(x)\} \Rightarrow t \geq \inf \{x : U \leq F(x)\} = X$ .  $\square$

PRZYKŁAD: Rozkład dyskretny:

$$\mathcal{P}[X = k] = p_k, \quad k = 0, 1, \dots; \quad \sum_k p_k = 1.$$

Jeżeli  $R \in \mathcal{U}(0, 1)$ , to  $X = \min \left\{ k : R \leq \sum_{i=0}^k p_i \right\}$ .

▷ Algorytm w C/C++:

```
int generujRozkladDyskretny(double rn, double* p) {  
    // Generowanie rozkładu dyskretnego:  
    //          P{X = k} = p[k], k = 0,1,...  
    // rn - liczba losowa z rozkładu rownomiernego na (0,1).  
    int k = 0;  
    double suma = p[0];  
    while (suma < rn) suma += p[++k];  
    return k;  
}
```

⇒ **Ćw. N8.2:** Korzystając z ogólnej metody odwracania dystrybuanty wygenerować rozkład dyskretny o gęstości prawdopodobieństwa:

$$\mathcal{P}(X = k) = p_k = A \sin \left( \frac{\pi}{10} \left[ k + \frac{1}{2} \right] \right), \quad k = 0, 1, \dots, 9.$$

gdzie  $A$  – stała normalizacyjna (do wyznaczenia).

Wykonać histogram generowanych liczb i porównać z rozkładem dokładnym (wykres).

## Zalety:

- Dokładna.
- Prosta i szybka dla niektórych rozkładów.
- Do wygenerowania zmiennej losowej o danym rozkładzie potrzebna jest tylko jedna liczba losowa o rozkładzie  $\mathcal{U}(0, 1)$ .

## Wady:

- Na ogół wymagane jest aby dystrybuanta była znana i odwracalna analitycznie → stosunkowo niewielka liczba funkcji!
- W zasadzie, można korzystać z numerycznego całkowania funkcji gęstości prawdopodobieństwa lub ze stabelaryzowanych wartości dystrybuanty (histogram) i zamiast analitycznie, numerycznie odwracać dystrybuantę – ta metoda jest jednak zwykle znacznie wolniejsza, mniej dokładna i bardziej narażona na niestabilności numeryczne.
- Trudna do zastosowania dla rozkładów wielowymiarowych.

### ¶ Dygresja: Numeryczne odwracanie dystrybuanty

- ▶ Szukanie miejsca zerowego  $X_0$  funkcji:  $\mathcal{F}_U(X) \equiv F(X) - U$ , gdzie  $U \in \mathcal{U}(0, 1)$   
(np. metodami: siecznych, stycznych itd.)  $\Rightarrow X_0 = F^{-1}(U)$ .

## I. Wariant podstawowy

Niech  $X$  – zmienna losowa o gęstości prawdopodobieństwa  $f(x)$  na przedziale  $[a, b]$ ,  
 $-\infty < a < b < +\infty$  oraz  $f(x) \leq c, \forall x \in [a, b], c < +\infty$ .

Schemat:

1. **Generujemy punkt**  $(U_1, U_2)$ :  $U_1 \in \mathcal{U}(a, b), U_2 \in \mathcal{U}(0, c)$ .
2. **Jeżeli**  $U_2 \leq f(U_1)$ , to  $X = U_1$ .

W przeciwnym razie parę  $(U_1, U_2)$  **eliminujemy** i wracamy do punktu 1.

$\Rightarrow$  Zmienna losowa  $X$  ma rozkład o gęstości prawdopodobieństwa  $f(x)$ .

Dowód:  $\mathcal{P}(X \leq t) = (b - a)c \int_a^t \frac{du_1}{b-a} \int_0^c \frac{du_2}{c} \Theta(f(u_1) - u_2) = \int_a^t du_1 f(u_1). \quad \boxtimes$

PRZYKŁAD: Problem "Igły Buffona".

► **Gęstość prawdopodobieństwa:**  $f(x) = \cos x, x \in [0, \frac{\pi}{2}], f(x) \leq 1$ .

▷ **Generujemy:**  $U_1 \in \mathcal{U}(0, \frac{\pi}{2}), U_2 \in \mathcal{U}(0, 1)$ ,

$$U_2 \begin{cases} \leq \cos U_1: & X = U_1, \\ > \cos U_1: & \text{odrzucaamy } (U_1, U_2). \end{cases}$$

$\Rightarrow$  Otrzymujemy ciąg liczb losowych  $X_1, X_2, \dots$  wygenerowanych wg. rozkładu  $f(x) = \cos x$ .

## Przykład metody eliminacji dla problemu „Igły Buffona”

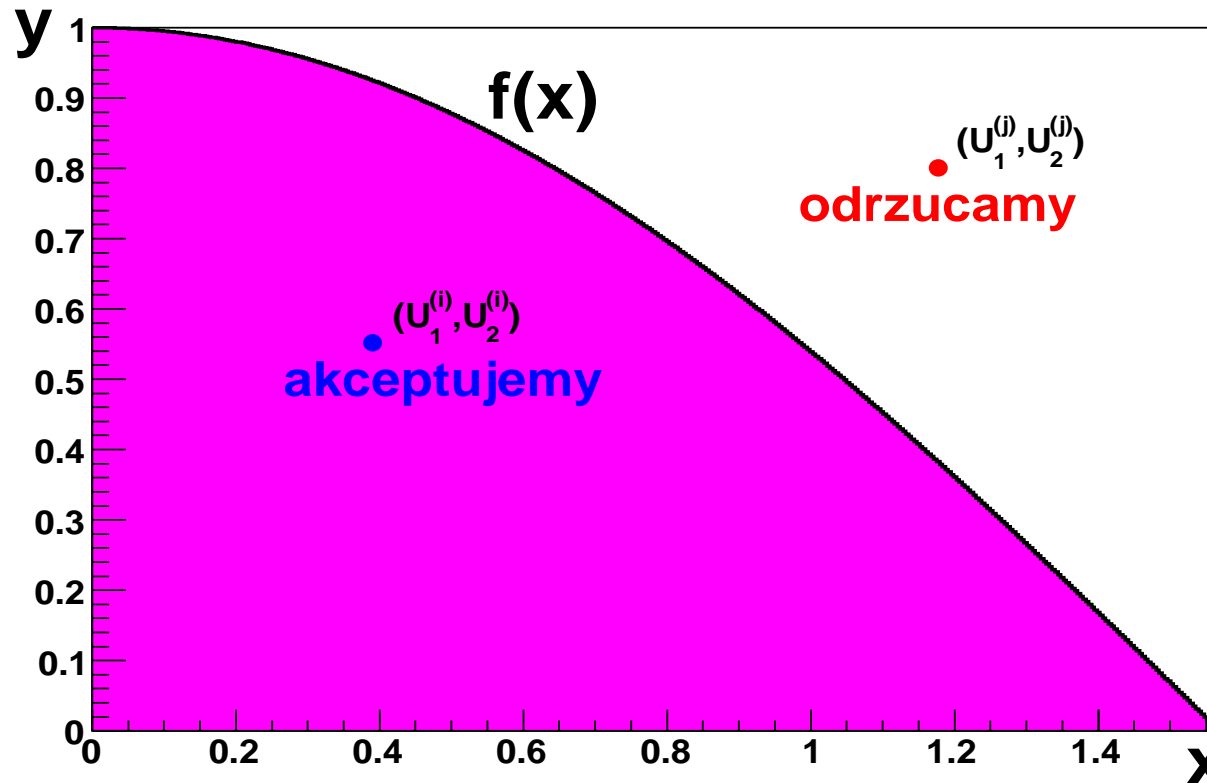

- ▶ Generujemy punkty  $(U_1, U_2)$  z rozkładu równomiernego na prostokącie  $(0, \frac{\pi}{2}) \times (0, 1)$ :
  - ▷ Punkty, które trafiają poniżej krzywej  $y = f(x)$  **akceptujemy**.
  - ▷ Punkty, które trafiają powyżej tej krzywej **odrzucamy (eliminujemy)**.
  - Zaakceptowane punkty pokrywają równomiernie obszar pod krzywą.
  - ⇒ Zmienna losowa  $X$  ma rozkład o gęstości prawdopodobieństwa  $f(x)$ .



## Wariant podstawowy – proste uogólnienie

Niech  $X = (X_1, X_2, \dots, X_m)$  –  $m$ -wymiarowa zmienna losowa o gęstości  $f(x_1, x_2, \dots, x_m)$  na zbiorze  $\Omega \subset \mathbb{R}^m$  i  $f(x_1, x_2, \dots, x_m) \leq c < +\infty$ .

Schemat:

1. Generujemy punkt  $(U_1, U_2, \dots, U_m) \in \mathcal{U}(\Omega)$  oraz  $U_{m+1} \in \mathcal{U}(0, c)$ .
2. Jeżeli  $U_{m+1} \leq f(U_1, \dots, U_m)$ , to  $X = (U_1, \dots, U_m)$ .

W przeciwnym razie **eliminujemy** wylosowany punkt i wracamy do punktu 1.

$\Rightarrow$  Zmienna losowa  $X$  ma rozkład o gęstości prawdopodobieństwa  $f(x_1, \dots, x_m)$ .

► Jak wylosować rozkład równomierny na zbiorze  $\Omega$ ?

▷ Najprościej:

Znaleźć taką kostkę  $K^m$  :  $\Omega \subset K^m$  i generować punkty równomiernie wewnątrz tej kostki, a następnie akceptować tylko te, które  $\in \Omega$ .

$\Rightarrow$  **Ćw. N8.3:** Posługując się metodą eliminacji wygenerować rozkład dany funkcją gęstości:

$$\psi(x, y) = c \sqrt{1 - (x^2 + y^2)}, \quad x^2 + y^2 \leq 1,$$

gdzie  $c$  – stała normalizacyjna (do wyznaczenia). Przy pomocy systemu ROOT wykonać dwuwymiarowy histogram generowanych punktów i porównać z rozkładem dokładnym.

Niech  $f(x)$  – gęstość prawdopodobieństwa, według której chcemy generować punkty losowe ( $x$  może być punktem wielowymiarowym).

Schemat:

1. Znajdujemy gęstość prawdopodobieństwa  $g(x)$  (tzw. **gęstość dominującą**), dla której generowanie punktów jest łatwe i szybkie (w najprostszym przypadku  $g(x) = \text{const}$ ) oraz wyznaczamy stałą  $c > 0$  tak, aby:

$$f(x) \leq c g(x), \quad \forall x, \quad \rightarrow \text{ optymalna wartość stałej: } c = \sup_x \frac{f(x)}{g(x)}.$$

2. Generujemy punkt  $X$  według rozkładu  $g(x)$  oraz liczbę losową:  $U \in \mathcal{U}(0, 1)$ .
3. Jeżeli  $cUg(X) \leq f(X)$ , to akceptujemy  $X$ .

W przeciwnym razie odrzucamy przypadek i wracamy do kroku 2.

▷ Alternatywny sposób:

Punkt 3. Obliczamy:  $w(X) = \frac{f(X)}{g(X)}$  – waga przypadku; znajdujemy wagę maksymalną:  $w_{max}$ .

Jeżeli  $w(X) \geq U w_{max}$ , to akceptujemy przypadek.

W przeciwnym razie odrzucamy przypadek i wracamy do kroku 2.

- Jeżeli przypadki ważone są akceptowalne (np. histogramy), to możemy pominąć odrzucanie (jak również generowanie pomocniczej liczby losowej  $U$ )  $\rightarrow$  w takim przypadku z każdym punktem losowym (przypadkiem)  $X$  będzie stowarzyszona **waga**  $w(X)$ .

- Zera funkcji  $g(x)$  są niebezpieczne, jeżeli w tych samych punktach  $f(x) \neq 0$ !
- Piki  $f(x)$  mogą popsuć wydajność generacji, jeżeli nie są dobrze aproksymowane przez  $g(x)$ !

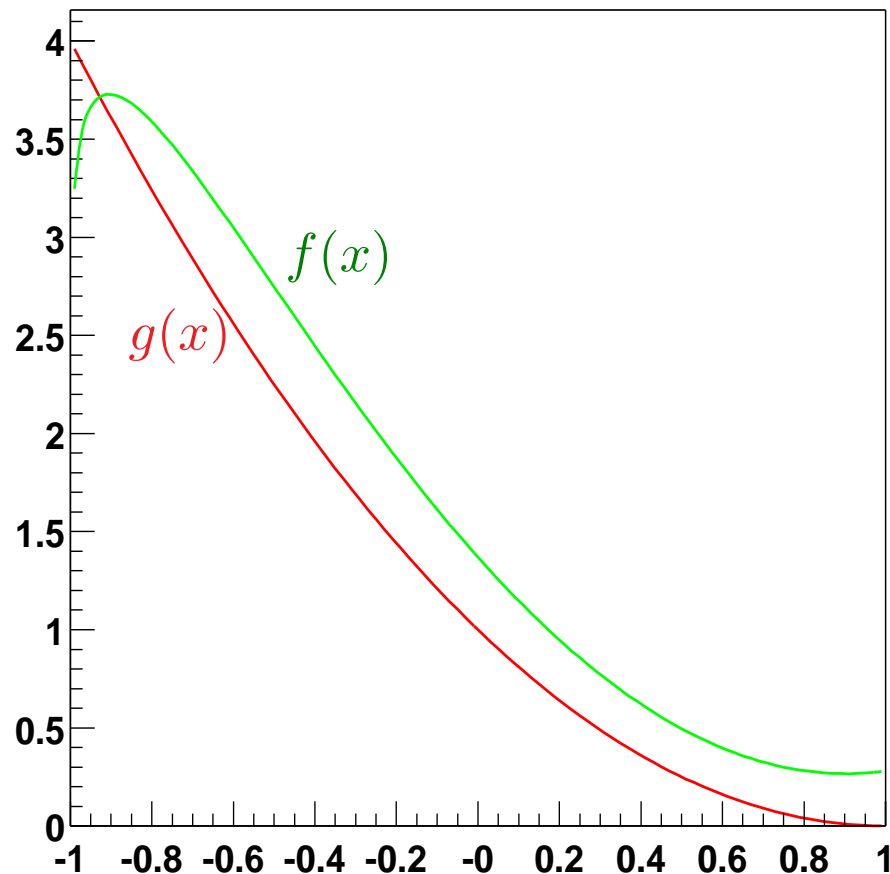

Zera funkcji  $g(x)$

→ nieskończony ogon wagi!

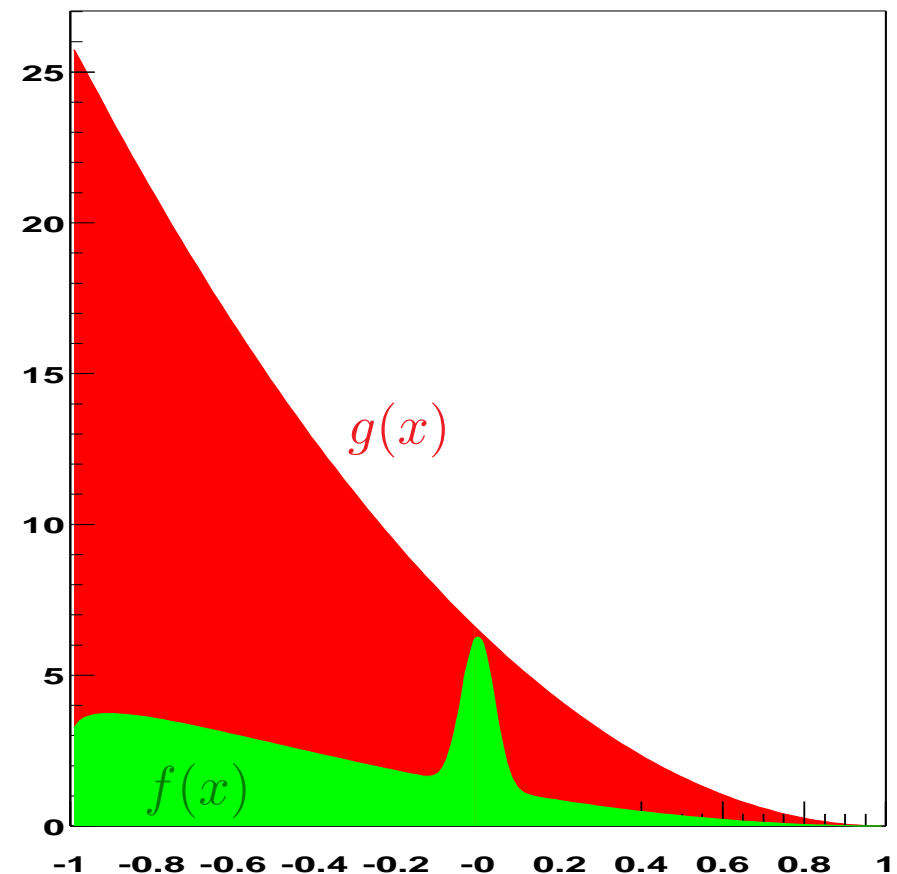

Wąskie piki funkcji  $f(x)$

→ duży współczynnik odrzucania!

PRZYKŁAD: Dodatnia połówka rozkładu normalnego  $N(0, 1)$ :

$$f(x) = \sqrt{\frac{2}{\pi}} e^{-\frac{x^2}{2}}, \quad x \geq 0.$$

→ Gęstość dominująca – rozkład wykładniczy  $E(0, 1)$  :

$$g(x) = e^{-x}, \quad x \geq 0.$$

⇒ Waga:

$$w(X) = \frac{f(X)}{g(X)} = \sqrt{\frac{2}{\pi}} e^{\frac{x(2-x)}{2}}.$$

⇒ Waga maksymalna:

$$w_{\max} = w(1) = \sqrt{\frac{2e}{\pi}}.$$

⇒ **Ćw. N8.4:** Posługując się ogólną metodą eliminacji wygenerować powyższy rozkład.

Wykonać histogramy dla przypadków nieważonych oraz dla przypadków ważonych i porównać je z rozkładem dokładnym.

## Superpozycja ciągła

Niech  $X$  – zmienna losowa o gęstości prawdopodobieństwa  $f(x)$ :

$$f(x) = \int g_y(x) h(y) dy,$$

gdzie:  $g_y(x)$  – pewna gęstość prawdopodobieństwa zależna od parametru  $y$ ;

$h(y)$  – pewna gęstość prawdopodobieństwa.

### Schemat generacji:

1. Wygenerować  $Y$  według rozkładu o gęstości  $h(y)$ .
2. Dla danej wartości  $Y$ , wygenerować  $X$  według rozkładu o gęstości  $g_Y(x)$ .

PRZYKŁAD:  $f(x) = n \int_1^{+\infty} y^{-n} e^{-xy} dy, \quad x, y > 0, \quad n \geq 1.$

Wprowadzamy funkcje:  $g_y(x) = ye^{-xy}$  i  $h(y) = ny^{-(n+1)}$ .

1. Liczby losowe  $Y$  o rozkładzie  $h(y)$  można generować metodą odwrócenia dystrybuanty:  
 $Y = (1 - U)^{-1/n}$ , gdzie  $U \in \mathcal{U}(0, 1)$ .
2. Liczby losowe  $X$  o rozkładzie  $g_y(x)$  generujemy z rozkładu wykładniczego  $E(0, \frac{1}{y})$ :  
 $X = -\frac{1}{Y} \ln V$ , gdzie  $V \in \mathcal{U}(0, 1)$ .

## Superpozycja dyskretna

Niech:

$$f(x) = \sum_{i=1}^{\infty} p_i g_i(x),$$

gdzie:  $p_i$  – gęstość pewnego rozkładu dyskretnego, tzn.  $p_i \geq 0$ ,  $\sum_{i=1}^{\infty} p_i = 1$ ;

$g_i(x)$  – gęstości pewnych rozkładów ciągłych.

Schemat generacji:

1. Wygenerować liczbę  $i$  według rozkładu o gęstości  $p_i$ , np. metodą odwrócenia dystrybuanty.
2. Dla danej wartości  $i$  wygenerować  $X$  według rozkładu o gęstości  $g_i(x)$ .

► Metoda ta jest nazywana także **metodą rozgałęzienia** lub **metodą wielokanałową**.

PRZYKŁAD 1:  $f(x) = \frac{5}{12} [1 + (x - 1)^4]$ ,  $0 \leq x \leq 2$ .

$$\rightarrow f(x) = \frac{5}{6} g_1(x) + \frac{1}{6} g_2(x),$$

gdzie:  $g_1(x) = \frac{1}{2}$ ,  $g_2(x) = \frac{5}{2}(x - 1)^4$ , tzn.  $p_1 = \frac{5}{6}$ ,  $p_2 = \frac{1}{6}$ .

$$\Rightarrow X = \left\{ \begin{array}{ll} 2U_2, & U_1 < \frac{5}{6} \\ 1 + (2U_2 - 1)^{\frac{1}{5}}, & U_1 \geq \frac{5}{6} \end{array} \right\} \quad U_1, U_2 \in \mathcal{U}(0, 1).$$

PRZYKŁAD 2: Rozkłady o gęstościach wielomianowych

Niech:

$$f(x) = \sum_{i=1}^n c_i x^i, \quad 0 \leq x \leq 1, \quad c_i \geq 0; \quad \sum_{i=1}^n \frac{c_i}{i+1} = 1.$$

Schemat generacji:

1. Wygenerować indeks  $i \in \{1, 2, \dots, n\}$  według rozkładu prawdopodobieństwa  $p_i = \frac{c_i}{i+1}$ .
  2. Dla danej wartości  $i$  wygenerować  $X$  według rozkładu o gęstości  $(i+1)x^i$ ,  $0 \leq x \leq 1$ .
- Jak generować rozkłady:  $(i+1)x^i$ ,  $0 \leq x \leq 1$ ?
- ▷ Metodą odwrócenia dystrybuanty:  $X = U^{1/(i+1)}$ , gdzie  $U \in \mathcal{U}(0, 1)$ .
  - ▷ Za pomocą wzoru:  $X = \max\{U_1, U_2, \dots, U_{i+1}\}$ , gdzie  $U_1, U_2, \dots, U_{i+1} \in \mathcal{U}(0, 1)$   
– niezależne zmienne losowe.
- ⇒ **Ćw. N8.5:** Posługując się metodą superpozycji rozkładów wygenerować podany w przykładzie rozkład ciągły dla kilku wartości  $n$  oraz rozkład dyskretny z przykładu 1. Wykonać histogramy generowanych liczb.

Niech  $X$  – zmienna losowa o gęstości prawdopodobieństwa:

$$f(x) = \sum_{n=1}^{\infty} p_n f_n(x), \quad p_n \geq 0, \quad \sum_{i=1}^{\infty} p_i = 1,$$

gdzie:  $f_n(x)$  – pewne zależne od  $n$  gęstości prawdopodobieństwa.

Dla każdej  $f_n$  znajdujemy gęstość dominującą  $g_n(x)$  oraz stałą  $c_n > 0$ , taką że:

$$f_n(x) \leq c_n g_n(x), \quad \forall x.$$

### Schemat generacji:

1. Wygenerować liczbę  $n$  według rozkładu prawdopodobieństwa  $\mathcal{P}\{n = i\} = p_i$ .
2. Dla danej wartości  $n$  wygenerować  $X$  według rozkładu o gęstości  $g_n(x)$ .
3. Wygenerować liczbę losową  $U \in \mathcal{U}(0, 1)$ .
4. Jeżeli  $c_n U g_n(X) \leq f_n(X)$ , to **zaakceptować**  $X$ .

W przeciwnym razie **odrzuć**  $X$  i wrócić do kroku 1.

### ▷ Alternatywny sposób:

Punkt 4. Obliczyć  $w_n(X) = \frac{f_n(X)}{g_n(X)}$  – waga przypadku; znaleźć wagę maksymalną:  $w_n^{max}$ .

Jeżeli  $w_n(X) \geq U w_n^{max}$ , to **zaakceptować** przypadek.

W przeciwnym razie **odrzuć** przypadek i wrócić do kroku 1.



Uwaga: Tutaj potrzebujemy wagę maksymalną dla każdej gałęzi  $n$  oddzielnie  $\Rightarrow$  liczba tych wag jest równa liczbie gałęzi; ich wartości można oszacować analitycznie bądź numerycznie (np. przez histogramowanie wag dla gałęzi w próbnym przebiegu generacji).

### PRZYKŁAD 1: Rozkłady o gęstościach wielomianowych

Niech gęstość prawdopodobieństwa:

$$f(x) = \sum_{i=1}^n c_i x^i, \quad 0 \leq x \leq 1,$$

ale  $\exists_{j \in \{1, \dots, n\}} : c_j < 0$ .

Możemy  $c_j$  przedstawić w postaci:  $c_j = c_j^+ - c_j^- : c_j^+, c_j^- > 0$ .

$$\Rightarrow f(x) = \sum_{i=1}^n c_i x^i \leq \sum_{i=1}^n c_i^+ x^i \equiv g(x).$$

► Funkcja:

$$\bar{g}(x) = \frac{g(x)}{\sum_{i=1}^n c_i^+}$$

jest gęstością pewnego rozkładu prawdopodobieństwa – spełnia rolę **gęstości dominującej** dla gęstości  $f(x)$ .

Schemat generacji:

1. Wygenerować  $X$  według rozkładu prawdopodobieństwa o gęstości  $\bar{g}$  (jak w metodzie dyskretnej superpozycji rozkładów).
2. Wygenerować  $U \in \mathcal{U}(0, 1)$ .
3. Jeżeli  $Ug(X) \leq f(X)$ , to zaakceptować przypadek.

W przeciwnym razie odrzucić przypadek i wrócić do kroku 1.

PRZYKŁAD 2: Dodatnia połówka rozkładu normalnego  $N(0, 1)$ :

$$f(x) = \sqrt{\frac{2}{\pi}} e^{-\frac{x^2}{2}}, \quad x \geq 0.$$

Przedstawiamy tę gęstość w postaci:

$$f(x) = \alpha_1 g_1(x) h_1(x) + \alpha_2 g_2(x) h_2(x),$$

gdzie:

$$\alpha_1 = \sqrt{\frac{2}{\pi}}, \quad \alpha_2 = \frac{1}{\sqrt{2\pi}},$$

$$g_1(x) = \begin{cases} 1, & 0 \leq x \leq 1, \\ 0, & x > 1, \end{cases}$$

$$g_2(x) = \begin{cases} 2e^{-2(x-1)}, & x \geq 1, \\ 0, & 0 \leq x < 1, \end{cases}$$

$$h_1(x) = e^{-\frac{x^2}{2}},$$

$$h_2(x) = e^{-\frac{(x-2)^2}{2}}.$$

► Zmienną losową  $X$  generujemy:

(a) z prawdopodobieństwem  $\alpha_1/(\alpha_1 + \alpha_2) = 2/3$  według rozkładu o gęstości  $g_1$

i dokonujemy eliminacji według funkcji  $h_1$ , → tzn. akceptacja dla:  $h_1(X) \geq U \in \mathcal{U}(0, 1)$ ,

(b) z prawdopodobieństwem  $\alpha_2/(\alpha_1 + \alpha_2) = 1/3$  według rozkładu o gęstości  $g_2$

i dokonujemy eliminacji według funkcji  $h_2$ , → tzn. akceptacja dla:  $h_2(X) \geq U \in \mathcal{U}(0, 1)$ .

⇒ **Ćw. 8.6:** Wygenerować powyższy rozkład. Wykonać histogram generowanych liczb losowych i porównać z rozkładem dokładnym.

► **W praktycznych obliczeniach Monte Carlo zwykle stosuje się kombinacje wielu metod generowania rozkładów liczb losowych (często postępując drogą kolejnych uproszczeń).**

Niech  $f = f_1 + f_2$  – gęstość zmiennej losowej  $X$  oraz  $p = \int f_1(x) dx$ .

$\implies f_1/p$  i  $f_2/(1-p)$  – gęstości pewnych rozkładów prawdopodobieństwa.

► Jeżeli funkcje  $f_1$  i  $f_2$  są tak dobrane, że łatwo możemy wygenerować:

- liczby losowe o rozkładzie z gęstością  $f_1/p$  metodą eliminacji z gęstością dominującą  $g$ ,
- liczby losowe o rozkładzie z gęstością  $f_2/(1-p)$ .

Schemat generacji:

1. Wygenerować  $X$  według rozkładu prawdopodobieństwa o gęstości  $g$ .
2. Wygenerować  $U \in \mathcal{U}(0, 1)$ .
3. Jeżeli  $Ug(X) > f_1(X)$ , to wygenerować  $X$  według rozkładu prawdopodobieństwa o gęstości  $f_2/(1-p)$ .  $\rightarrow$  bo  $\int [g(x) - f_1(x)] dx = 1 - p = \int f_2(x) dx$ .
4. Zwrócić  $X$ .

► Szczególnie prosty i szybki, gdy  $f_2 = \text{const}$ .

▷ Np. funkcja  $f$  odcięta od zera, tzn.  $\inf_x f(x) > 0$ , wówczas można wziąć:  $f_2 = \inf_x f(x)$ .

▷  $f_2 = c \delta(x - x_0)$ , tzn. rozkład dyskretny jednopunktowy (w kroku 3. bierzemy:  $X = x_0$ ).

Metoda superpozycji:

$$f(x) = \sum_{i=1}^K p_i g_i(x)$$

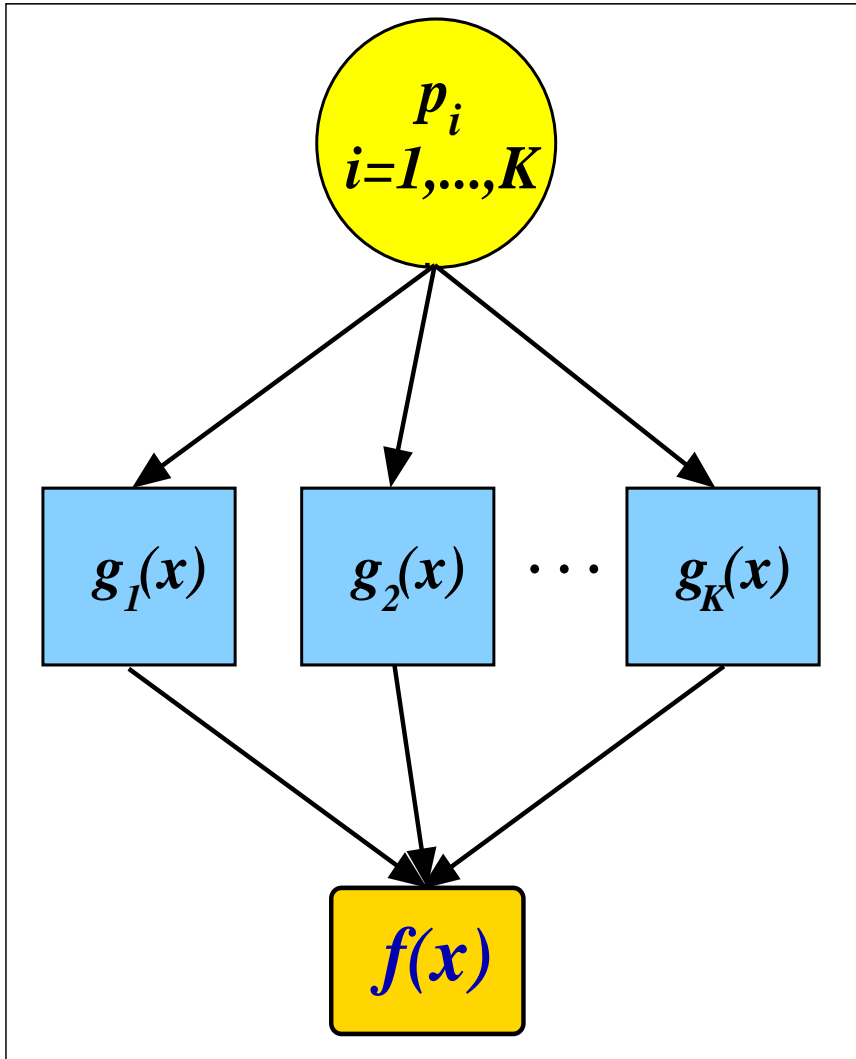

Kombinacja superpozycji i eliminacji:

$$f(x) = \sum_{i=1}^K p_i f_i(x)$$

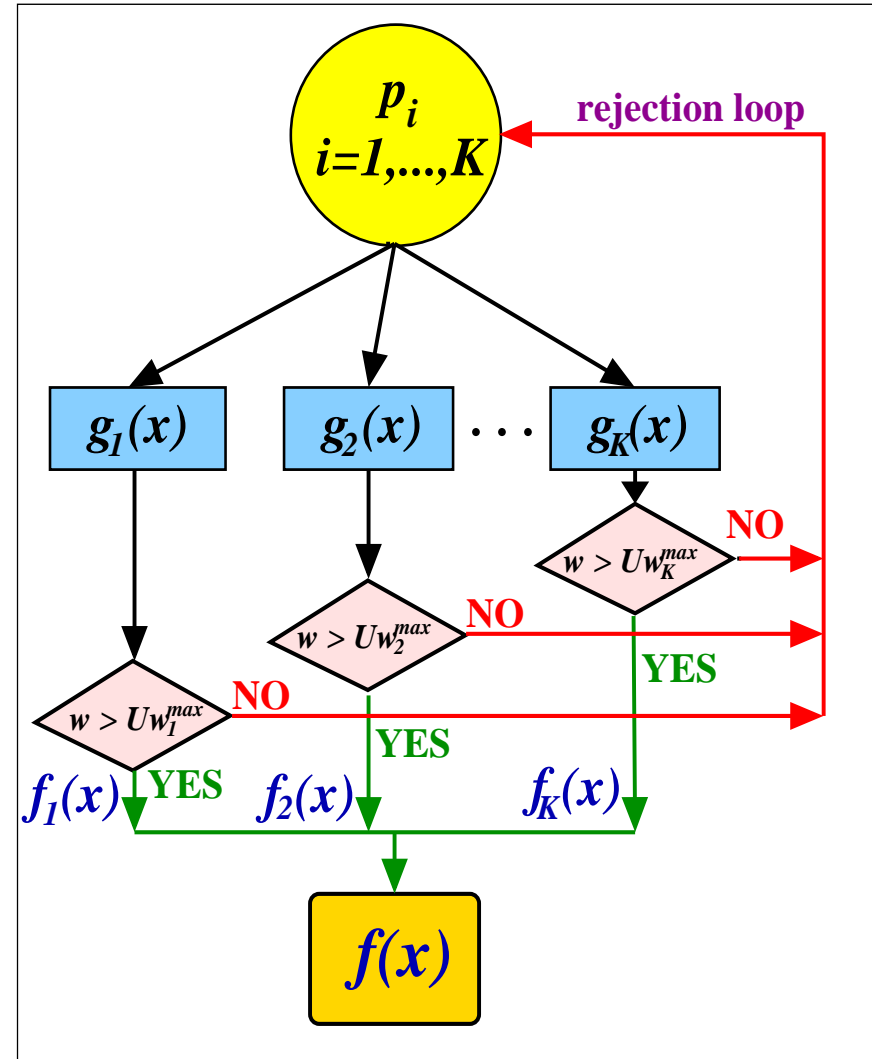

Supplement: mmc06 [file mmc06.pdf]
